# Supplementary material for: A trigger model of apoptosis induced by tumor necrosis factor signaling
Source: PubMed Central journal article supplement (PMC3121113; doi:10.1186/1752-0509-5-s1-s13), 2011-06-20
Supplement: 1752-0509-5-S1-S13-S1.pdf [file 1752-0509-5-S1-S13-S1.pdf]

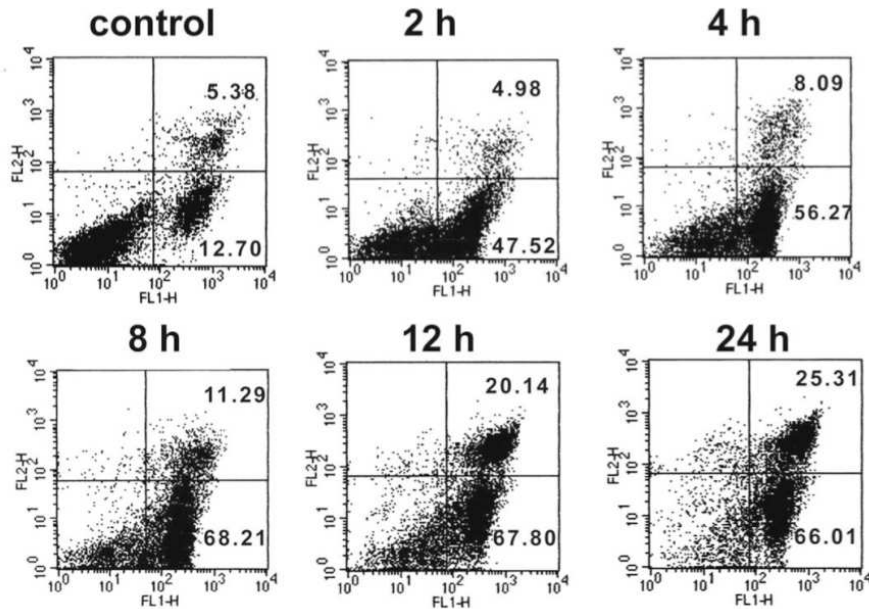

**Figure S1.** Jurkat cells apoptosis induced with TRAIL (50ng/ml) in a time dependent manner. Jurkat cells were treated with TRAIL for different time (0, 2, 4, 8, 12, 24 h ), then washed twice with PBS, and resuspended in 200  $\mu$ l binding buffer (10mM HEPES, pH 7.4, 140mM NaCl, 1mM MgCl<sub>2</sub>, 5mM KCl, 2.5mM CaCl<sub>2</sub>). FITC-conjugated Annexin V was added to a final concentration of 0.5  $\mu$ g/ml. After incubation for 20 minutes at room temperature in the dark, PI was added at 1  $\mu$ g/ml, and the samples were immediately analyzed on a FACSCalibur flow cytometer (Becton Dickinson, USA).
